# Supplementary material
Source: Springer Nature journal article supplement (https://www.springermedizin.de/resource/supplementary/12957_2012_1166_MOESM8_ESM.pdf/9561838)

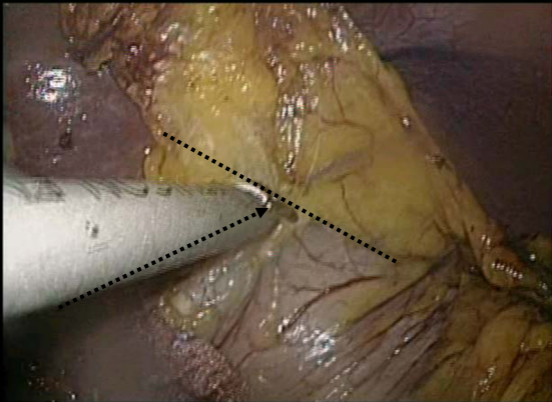

Supplement: MOESM8 [file 9561838]
